# Supplementary material for: Oxygen-powered sustainable FePO 4 preparation for sodium metal batteries with Li acetate recovery
Source: Royal Society of Chemistry journal article supplement (doi:10.1039/d4ee03951c), 2024-12-19
Supplement: d4ee03951c1.pdf [file d4ee03951c1.pdf]

## Electronic Supplementary Information

# Oxygen-powered sustainable FePO<sub>4</sub> preparation for sodium metal batteries with Li acetate recovery

Fumiyasu Nozaki<sup>1</sup>, Shaoning Zhang<sup>1</sup>, Jinkwang Hwang<sup>1,\*</sup>, Martin Hoffmann Petersen<sup>2</sup>, Jin Hyun Chang<sup>2</sup>, Juan María García-Lastra<sup>2</sup>, and Kazuhiko Matsumoto<sup>1,\*</sup>

<sup>1</sup>Graduate School of Energy Science, Kyoto University, Yoshida-honmachi, Sakyo-ku, Kyoto 606-8501, Japan.

<sup>2</sup>Department of Energy Conversion and Storage, Technical University of Denmark, 2800 Kgs. Lyngby, Denmark

Corresponding Author

\*E-mail: hwang.jinkwang.5c@kyoto-u.ac.jp

\*E-mail: matsumoto.kazuhiko.4c@kyoto-u.ac.jp

Keywords: Sodium metal batteries, FePO<sub>4</sub>, olivine, triphylite, sustainable delithiation

## Electrochemical test procedures of the pristine and R-LFP

The LiFePO<sub>4</sub> positive electrodes were prepared by mixing the pristine or R-LFP with Super C65 carbon black (MTI) and polyvinylidene fluoride (PVDF, Kureha) (80:15:5 wt%) in *N*-methyl-2-pyrrolidone (NMP, Fujifilm Wako Pure Chemicals, purity of >99.0%) using a planetary mixer (AR-100, Thinky). The mixture was thereafter pasted onto Al foil and dried at 60 °C for 3 h. The dried electrode was punched into discs (diameter: 10 mm) and then vacuum-dried overnight at 80 °C. Under a dry Ar atmosphere (H<sub>2</sub>O < 1 ppm and O<sub>2</sub> < 1 ppm) in a glove box, 2032-type coin cells were assembled. The lithium metal (Sigma-Aldrich, purity of 99.9%) that was cut into a disk (diameter of 13 mm) and attached to a stainless-steel plate current collector was used as a negative electrode. As the electrolyte, 1 mol dm<sup>-3</sup> Li[PF<sub>6</sub>]-EC/DMC (1:1 v/v) (Kishida chemical) was selected. A glass fiber (Whatman GF/A) was used as a separator. Charge–discharge properties were tested using a charge-discharge test device (HJ1001SD8, Hokuto Denko) at 25 °C. The cutoff voltage and C-rate were set in the 2.0–4.2 V range and 0.05C (1C = 170 mA g<sup>-1</sup>), respectively. The capacity was calculated based on the weight of the LiFePO<sub>4</sub> active material.

**Table S1** Crystallographic data of the P-LFP by the Rietveld refinement.

| LiFePO <sub>4</sub> (Space group: <i>Pnma</i> ) |                |            |            |                       |                       |       |
|-------------------------------------------------|----------------|------------|------------|-----------------------|-----------------------|-------|
| $R_p = 16.0\%$ , $R_{wp} = 11.5\%$              |                |            |            |                       |                       |       |
| <hr/>                                           |                |            |            |                       |                       |       |
|                                                 | $a$ (Å)        | $b$ (Å)    | $c$ (Å)    | $V$ (Å <sup>3</sup> ) |                       |       |
| <hr/>                                           |                |            |            |                       |                       |       |
|                                                 | 10.32279(8)    | 6.00338(4) | 4.68896(4) | 290.582(4)            |                       |       |
| <hr/>                                           |                |            |            |                       |                       |       |
| Atom                                            | Wyckoff symbol | $x$        | $y$        | $z$                   | $B$ (Å <sup>2</sup> ) | Occ.  |
| <hr/>                                           |                |            |            |                       |                       |       |
| Li                                              | 4 <i>a</i>     | 0          | 0          | 0                     | 0.5                   | 1.000 |
| Fe                                              | 4 <i>c</i>     | 0.28229(9) | 0.2500     | 0.9759(3)             | 0.5                   | 1.000 |
| P                                               | 4 <i>c</i>     | 0.0958(2)  | 0.2500     | 0.4227(5)             | 0.5                   | 1.000 |
| O1                                              | 4 <i>c</i>     | 0.0967(5)  | 0.2500     | 0.7423(8)             | 0.5                   | 1.000 |
| O2                                              | 4 <i>c</i>     | 0.4560(6)  | 0.2500     | 0.2088(7)             | 0.5                   | 1.000 |
| O3                                              | 8 <i>d</i>     | 0.1654(3)  | 0.0476(5)  | 0.2853(5)             | 0.5                   | 1.000 |

The starting parameters were taken from a previous report<sup>1</sup>, and the  $B$  factor and Occupancy were fixed at 0.5 and 1.0, respectively.

**Table S2** Crystallographic data of the PO-FP by the Rietveld refinement.

| FePO <sub>4</sub> (Space group: <i>Pnma</i> ) |                |             |            |                       |                       |       |
|-----------------------------------------------|----------------|-------------|------------|-----------------------|-----------------------|-------|
| $R_p = 14.9\%$ , $R_{wp} = 9.9\%$             |                |             |            |                       |                       |       |
| <hr/>                                         |                |             |            |                       |                       |       |
|                                               | $a$ (Å)        | $b$ (Å)     | $c$ (Å)    | $V$ (Å <sup>3</sup> ) |                       |       |
| <hr/>                                         |                |             |            |                       |                       |       |
|                                               | 9.81209(12)    | 5.78685(6)  | 4.78223(6) | 271.540(5)            |                       |       |
| <hr/>                                         |                |             |            |                       |                       |       |
| Atom                                          | Wyckoff symbol | $x$         | $y$        | $Z$                   | $B$ (Å <sup>2</sup> ) | Occ.  |
| <hr/>                                         |                |             |            |                       |                       |       |
| Fe                                            | 4 <i>c</i>     | 0.27329(10) | 0.2500     | 0.9498(2)             | 0.5                   | 1.000 |
| P                                             | 4 <i>c</i>     | 0.09449(18) | 0.2500     | 0.4010(4)             | 0.5                   | 1.000 |
| O1                                            | 4 <i>c</i>     | 0.1222(3)   | 0.2500     | 0.7028(8)             | 0.5                   | 1.000 |
| O2                                            | 4 <i>c</i>     | 0.4410(4)   | 0.2500     | 0.1619(6)             | 0.5                   | 1.000 |
| O3                                            | 8 <i>d</i>     | 0.1705(3)   | 0.0413(4)  | 0.2552(4)             | 0.5                   | 1.000 |

The starting parameters were taken from a previous report<sup>1</sup>, and the  $B$  factor and Occupancy were fixed at 0.5 and 1.0, respectively.

**Table S3** Organic elemental analysis of the recovered lithium acetate.

| Element | Composition (wt%) |
|---------|-------------------|
| H       | 5.0               |
| C       | 33.9              |

**Table S4** Crystallographic data of the R-LFP by the Rietveld refinement.

| LiFePO <sub>4</sub> (Space group: <i>Pnma</i> ) |                |             |             |                       |                       |       |
|-------------------------------------------------|----------------|-------------|-------------|-----------------------|-----------------------|-------|
| $R_p = 12.1\%$ , $R_{wp} = 8.3\%$               |                |             |             |                       |                       |       |
| <hr/>                                           |                |             |             |                       |                       |       |
|                                                 | $a$ (Å)        | $b$ (Å)     | $c$ (Å)     | $V$ (Å <sup>3</sup> ) |                       |       |
|                                                 | 10.3146(3)     | 6.00458(14) | 4.69769(13) | 290.952(13)           |                       |       |
| <hr/>                                           |                |             |             |                       |                       |       |
| Atom                                            | Wyckoff symbol | $x$         | $y$         | $z$                   | $B$ (Å <sup>2</sup> ) | Occ.  |
| <hr/>                                           |                |             |             |                       |                       |       |
| Li                                              | $4a$           | 0           | 0           | 0                     | 0.5                   | 1.000 |
| Fe                                              | $4c$           | 0.28317(11) | 0.2500      | 0.9736(4)             | 0.5                   | 1.000 |
| P                                               | $4c$           | 0.0977(3)   | 0.2500      | 0.4199(6)             | 0.5                   | 1.000 |
| O1                                              | $4c$           | 0.1025(6)   | 0.2500      | 0.7297(10)            | 0.5                   | 1.000 |
| O2                                              | $4c$           | 0.4599(7)   | 0.2500      | 0.2089(9)             | 0.5                   | 1.000 |
| O3                                              | $8d$           | 0.1595(4)   | 0.0472(7)   | 0.2750(6)             | 0.5                   | 1.000 |

The starting parameters were taken from a previous report<sup>1</sup>, and the  $B$  factor and Occupancy were fixed at 0.5 and 1.0, respectively.

**Table S5** Crystallographic data of RO-FP by the Rietveld refinement.

| FePO <sub>4</sub> (Space group: <i>Pnma</i> ) |                |             |             |                       |                       |       |
|-----------------------------------------------|----------------|-------------|-------------|-----------------------|-----------------------|-------|
| $R_p = 16.3\%$ , $R_{wp} = 10.6\%$            |                |             |             |                       |                       |       |
| <hr/>                                         |                |             |             |                       |                       |       |
|                                               | $a$ (Å)        | $b$ (Å)     | $c$ (Å)     | $V$ (Å <sup>3</sup> ) |                       |       |
| <hr/>                                         |                |             |             |                       |                       |       |
|                                               | 9.8196(3)      | 5.79774(17) | 4.77120(17) | 271.632(16)           |                       |       |
| <hr/>                                         |                |             |             |                       |                       |       |
| Atom                                          | Wyckoff symbol | $x$         | $y$         | $z$                   | $B$ (Å <sup>2</sup> ) | Occ.  |
| <hr/>                                         |                |             |             |                       |                       |       |
| Fe                                            | 4 <i>c</i>     | 0.27397(18) | 0.2500      | 0.9511(4)             | 0.5                   | 1.000 |
| P                                             | 4 <i>c</i>     | 0.0940(3)   | 0.2500      | 0.3908(7)             | 0.5                   | 1.000 |
| O1                                            | 4 <i>c</i>     | 0.1309(6)   | 0.2500      | 0.6895(14)            | 0.5                   | 1.000 |
| O2                                            | 4 <i>c</i>     | 0.4501(8)   | 0.2500      | 0.1436(11)            | 0.5                   | 1.000 |
| O3                                            | 8 <i>d</i>     | 0.1734(5)   | 0.0549(7)   | 0.2453(7)             | 0.5                   | 1.000 |

The starting parameters were taken from a previous report<sup>1</sup>, and the  $B$  factor and Occupancy were fixed at 0.5 and 1.0, respectively.

**Table S6** Comparison of the capacity, average voltage, and energy density calculated based on the total mass of positive and negative active materials in this study and several phosphate full cell systems<sup>2-5</sup>.

| Full cell system                                                                                             | N/P ratio | Capacity<br>(mAh g <sup>-1</sup> ) | Average voltage<br>(V) | Energy density<br>(Wh kg <sup>-1</sup> ) | Temperature<br>(°C) | Rate or<br>current density                 | Reference |
|--------------------------------------------------------------------------------------------------------------|-----------|------------------------------------|------------------------|------------------------------------------|---------------------|--------------------------------------------|-----------|
| Na/FePO <sub>4</sub>                                                                                         | 1.20      | 128                                | 2.86                   | 364                                      | 90                  | 10 mA (g-FePO <sub>4</sub> ) <sup>-1</sup> | This work |
| Na/FePO <sub>4</sub>                                                                                         | 0.56      | 108                                | 2.78                   | 300                                      | 25                  | 10 mA (g-FePO <sub>4</sub> ) <sup>-1</sup> | This work |
| O-CCF/Na <sub>3</sub> V <sub>2</sub> (PO <sub>4</sub> ) <sub>3</sub>                                         | 0         | 74.3                               | 3.4                    | 252                                      | Room temp.          | 1 mA cm <sup>-2</sup>                      | 2         |
| Na/Na <sub>3</sub> V <sub>2</sub> (PO <sub>4</sub> ) <sub>3</sub>                                            | 1.97      | 83.8                               | 3.34                   | 268                                      | 25                  | 0.2C                                       | 3         |
| Na/Na <sub>3</sub> V <sub>2</sub> (PO <sub>4</sub> ) <sub>3</sub>                                            | 1.81      | 80.6                               | 3.34                   | 280                                      | 90                  | 0.2C                                       | 3         |
| Na/Na <sub>3</sub> V <sub>2</sub> (PO <sub>4</sub> ) <sub>2</sub> F <sub>3</sub>                             | 4         | 83.4                               | 3.54                   | 295                                      | 25                  | 1C                                         | 4         |
| Graphite-Na/Na <sub>4</sub> Fe <sub>3</sub> (PO <sub>4</sub> ) <sub>2</sub> (P <sub>2</sub> O <sub>7</sub> ) | -         | 81.7                               | 3.0                    | 245                                      | 25                  | 0.75 mA cm <sup>-2</sup>                   | 5         |



**Table S7** Comparison of the capacity, average voltage, and energy density calculated based on the total mass of positive and negative active materials in this study.

| <b>FePO<sub>4</sub> source</b> | <b>FePO<sub>4</sub> mass loading<br/>(mg cm<sup>-2</sup>)</b> | <b>N/P ratio</b> | <b>Capacity<br/>(mAh g<sup>-1</sup>)</b> | <b>Average voltage<br/>(V)</b> | <b>Energy density<br/>(Wh kg<sup>-1</sup>)</b> | <b>Temperature<br/>(°C)</b> | <b>Rate<br/>(mA (g-FePO<sub>4</sub>)<sup>-1</sup>)</b> |
|--------------------------------|---------------------------------------------------------------|------------------|------------------------------------------|--------------------------------|------------------------------------------------|-----------------------------|--------------------------------------------------------|
| PO-FP                          | 9.9                                                           | 1.20             | 128                                      | 2.85                           | 364                                            | 90                          | 10                                                     |
| RO-FP                          | 8.4                                                           | 0.56             | 108                                      | 2.78                           | 300                                            | 25                          | 10                                                     |
| RO-FP                          | 8.4                                                           | 0.56             | 94                                       | 2.65                           | 248                                            | 25                          | 100                                                    |
| RO-FP                          | 8.1                                                           | 1.44             | 97                                       | 2.79                           | 270                                            | 25                          | 10                                                     |
| RO-FP                          | 8.1                                                           | 1.44             | 80                                       | 2.65                           | 213                                            | 25                          | 100                                                    |

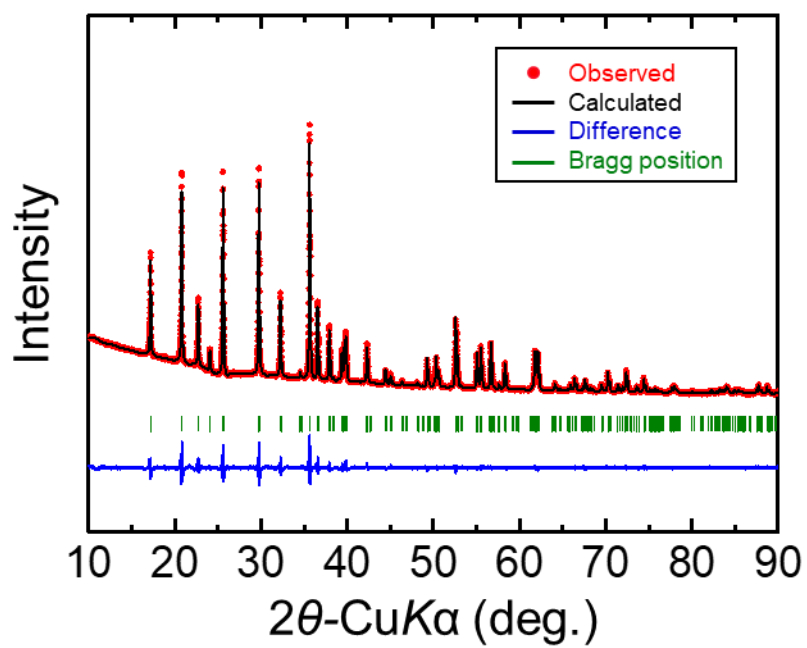

**Fig. S1** Rietveld refinement result of the P-LFP.

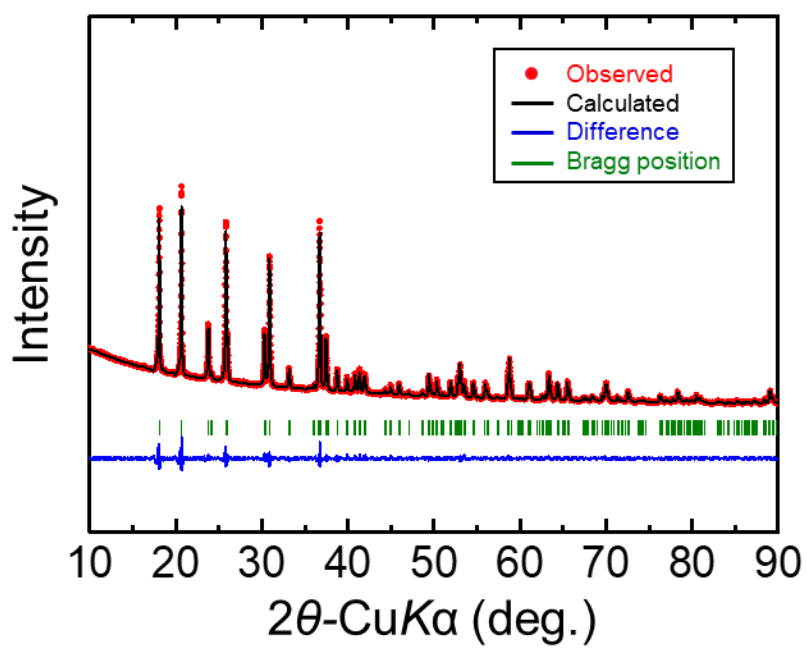

**Fig. S2** Rietveld refinement result of the PO-FP.

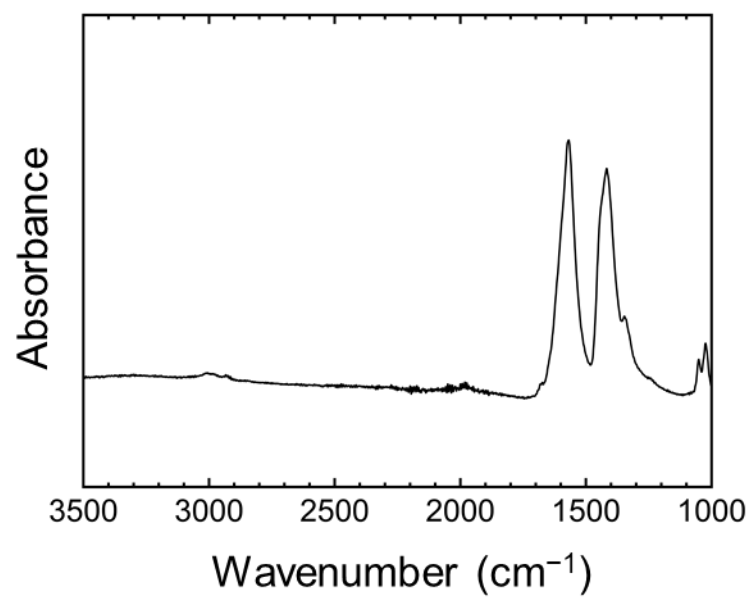

**Fig. S3** FT-IR spectra of the recovered lithium acetate.

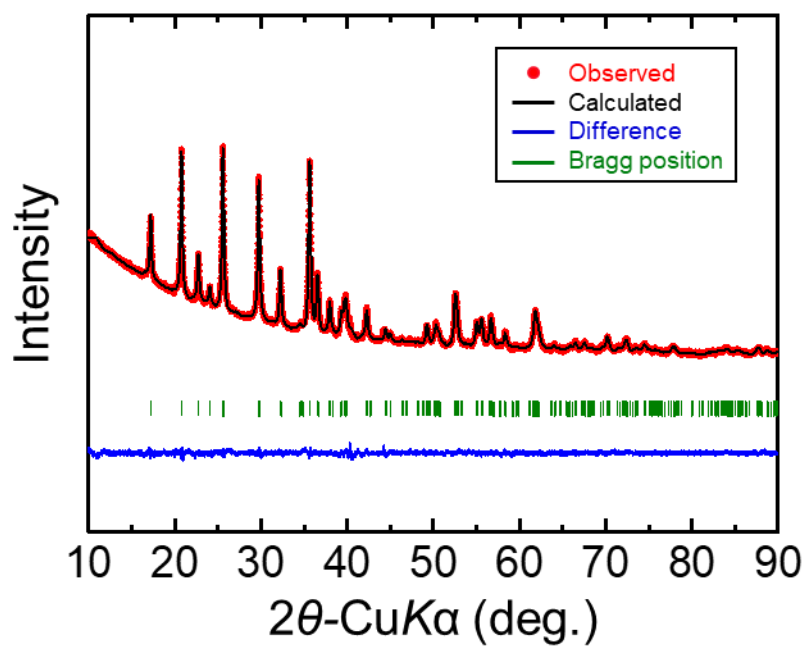

**Fig. S4** Rietveld refinement result of the R-LFP.

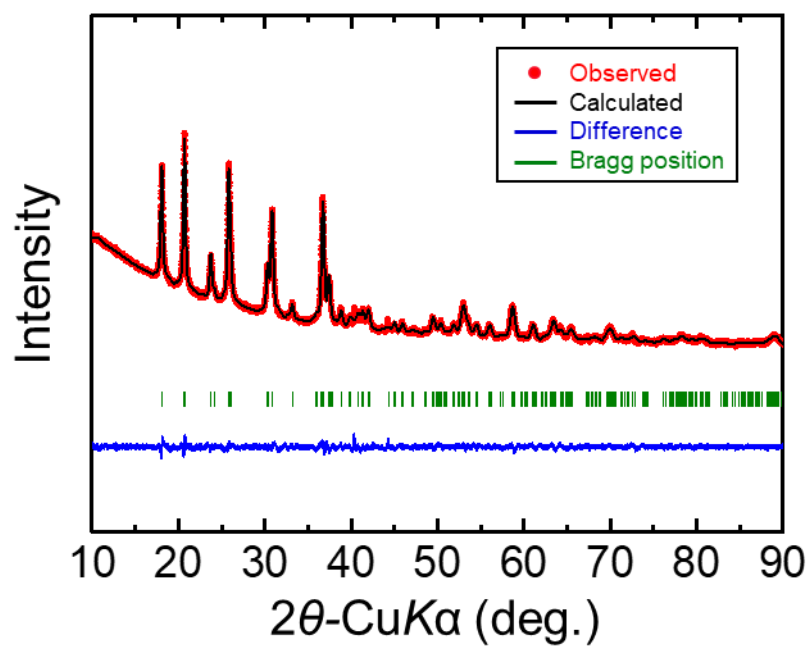

**Fig. S5** Rietveld refinement result of the RO-FP.

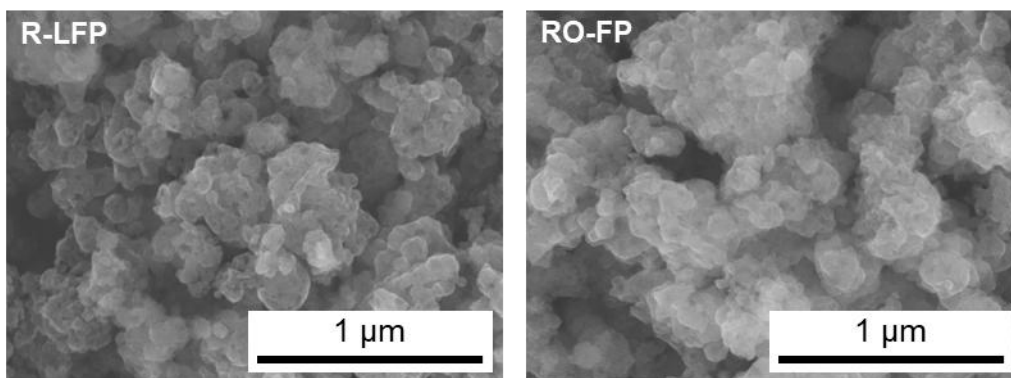

**Fig. S6** SEM images of R-LFP and RO-FP.

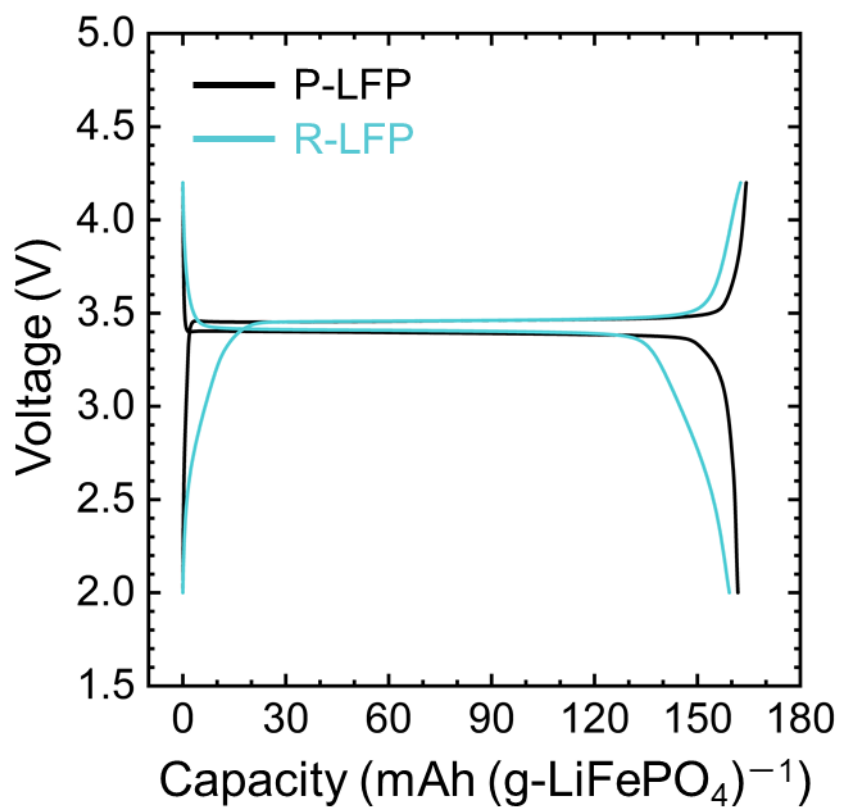

**Fig. S7** Charge–discharge curves of the Li/P-LFP and Li/R-LFP half cells at 25 °C. C-rate: 0.05C (1C = 170 mA g<sup>-1</sup>).



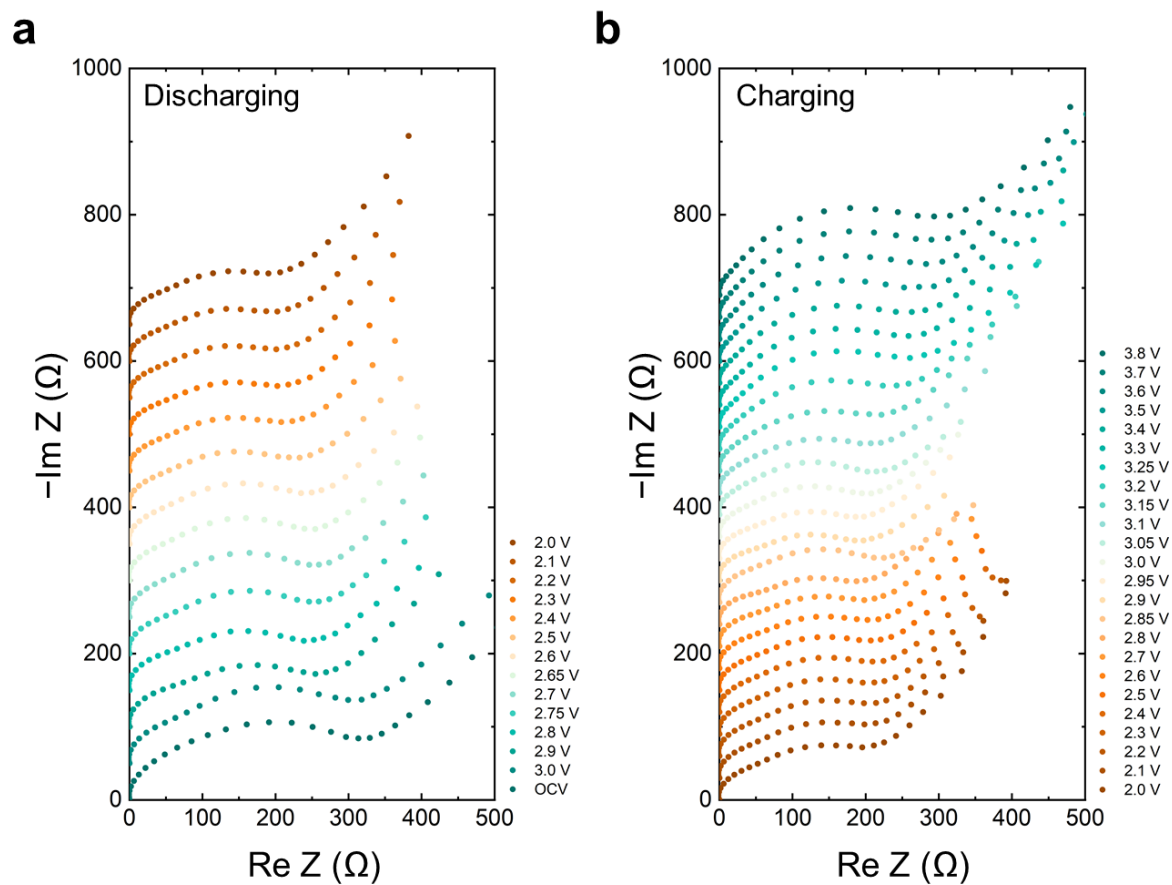

**Fig. S8** *In situ* EIS results of the RO-FP electrode at 25 °C (a) obtained after constant voltage discharging from open circuit voltage (OCV) to 2.0 V, and (b) obtained after constant voltage charging from 2.0 V to 3.8 V.

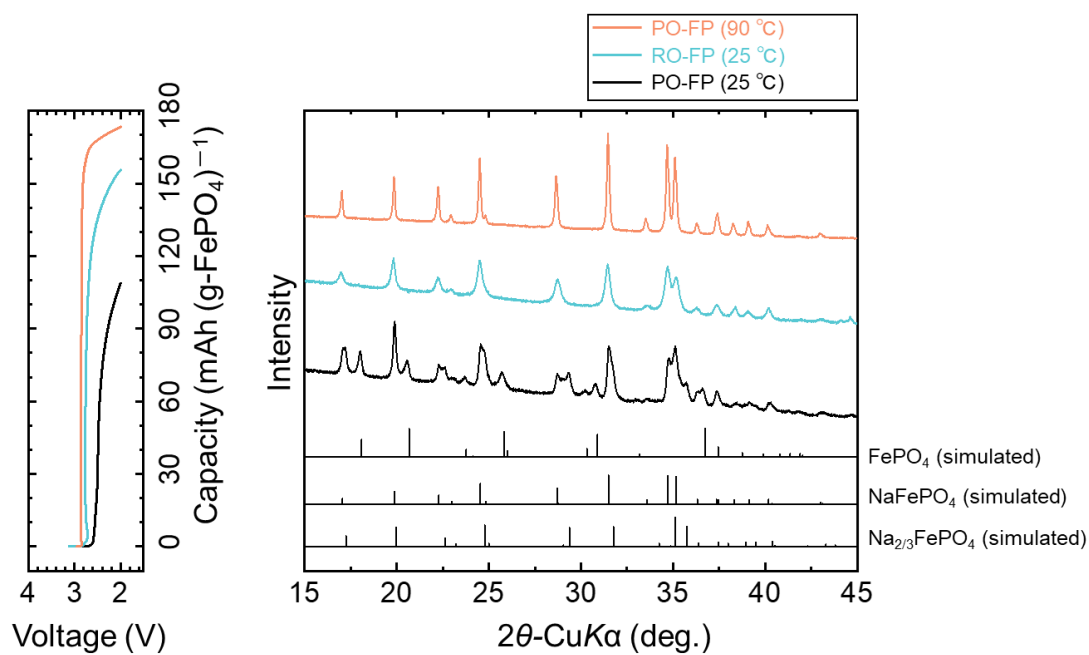

**Fig. S9** *Ex situ* XRD patterns of the FePO<sub>4</sub> electrodes after the first discharge. Rate: 10 mA (g-FePO<sub>4</sub>)<sup>-1</sup>. The simulated patterns of FePO<sub>4</sub>, NaFePO<sub>4</sub>, and Na<sub>2/3</sub>FePO<sub>4</sub> are calculated using VESTA software based on crystallographic data in previous reports<sup>1,6</sup>.

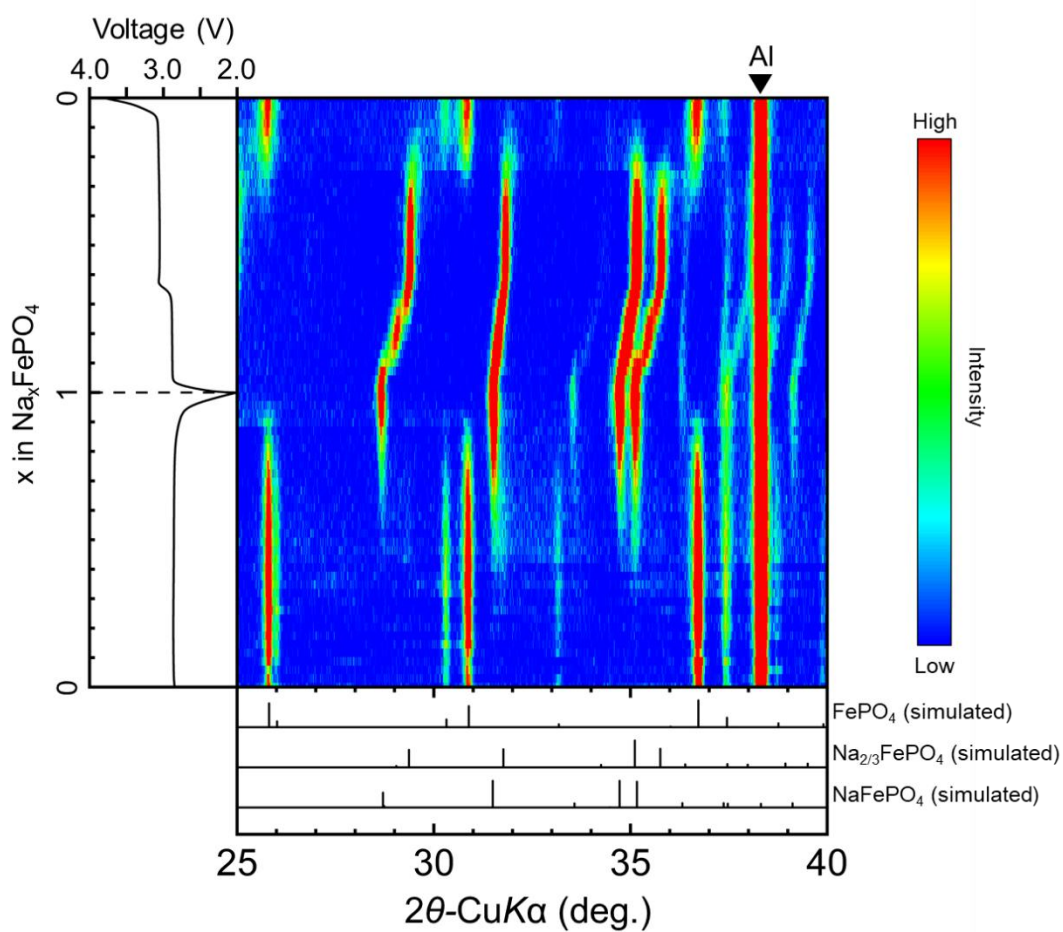

**Fig. S10** *In situ* XRD of the PO-FP electrode during charge–discharge at 90 °C. Rate: 10 mA  $(\text{g-FePO}_4)^{-1}$ . The simulated patterns of  $\text{FePO}_4$ ,  $\text{NaFePO}_4$ , and  $\text{Na}_{2/3}\text{FePO}_4$  are calculated using VESTA software based on crystallographic data in previous reports<sup>1, 6</sup>. The peak at  $38.47^\circ$  is assigned to Al current collector<sup>7</sup>.

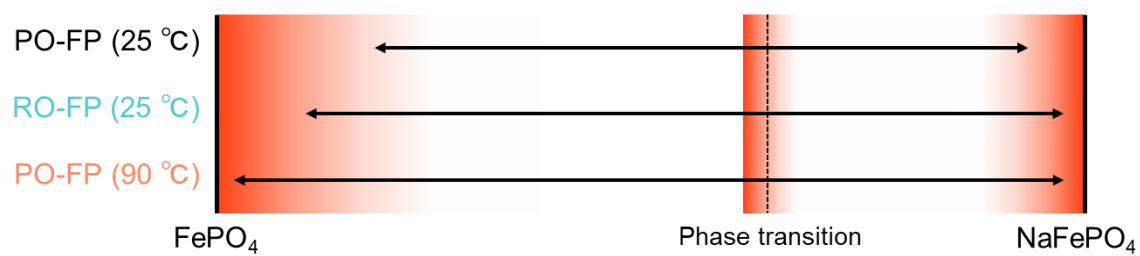

**Fig. S11** An illustration of kinetic barriers for PO-FP (25 °C), RO-FP (25 °C), and PO-FP (90 °C) during charge–discharge. Darker red shading indicates higher kinetic barriers. Black arrows show the range within which the reversible sodium insertion/extraction reaction can occur.

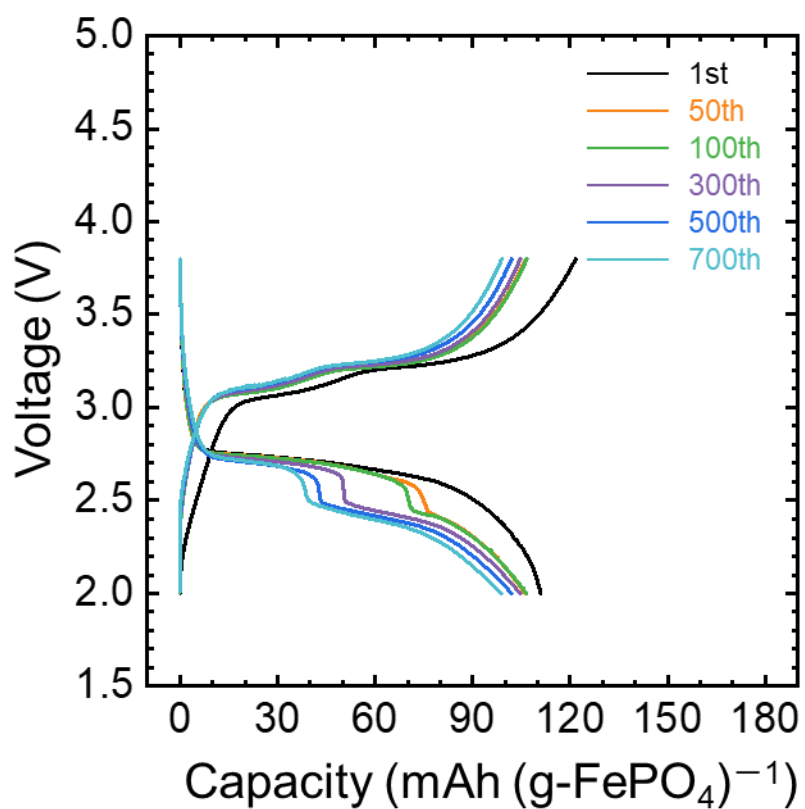

**Fig. S12** Charge–discharge curves during cycle performance test of the Na/RO-FP full cell shown in **Fig. 6b** at 25 °C (N/P = 1.44). Rate: 100 mA (g-FePO<sub>4</sub>)<sup>-1</sup>.

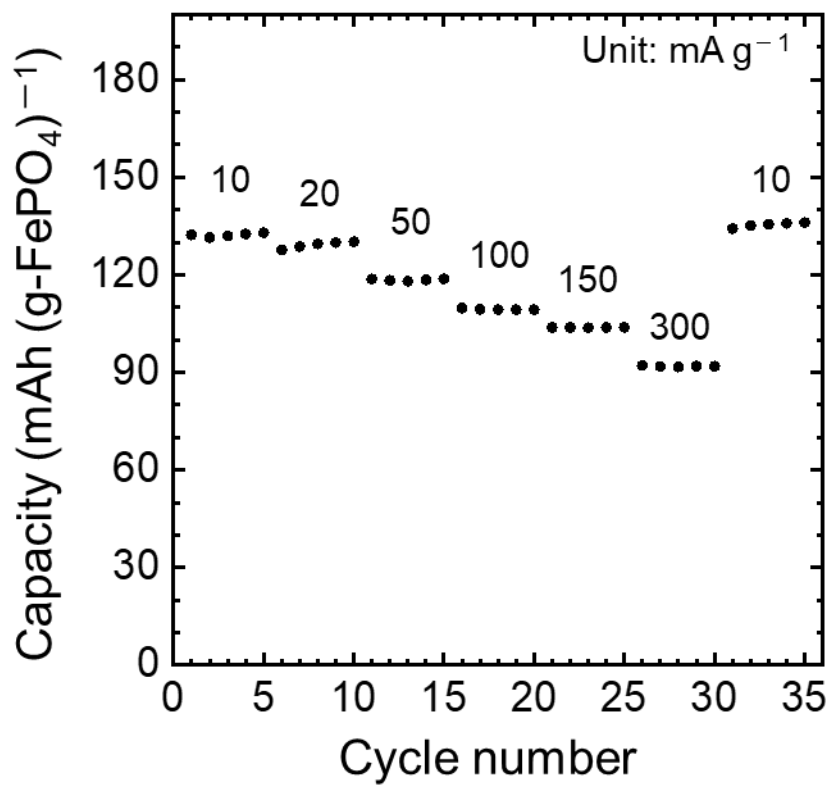

**Fig. S13** Rate capability of the Na/RO-FP cell with 1 mol dm<sup>-3</sup> Na[PF<sub>6</sub>]-DME at 25 °C.

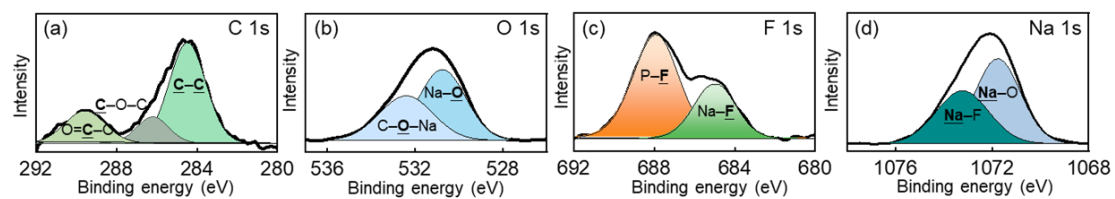

**Fig. S14** XPS spectra of (a) C 1s, (b) O 1s, (c) F 1s, and (d) Na 1s regions for characterization of the SEI layer on the metallic sodium in Na/FePO<sub>4</sub> cell after 100 cycles at 100 mA (g-FePO<sub>4</sub>)<sup>-1</sup>. Electrolyte: 1 mol dm<sup>-3</sup> Na[PF<sub>6</sub>]-DME.

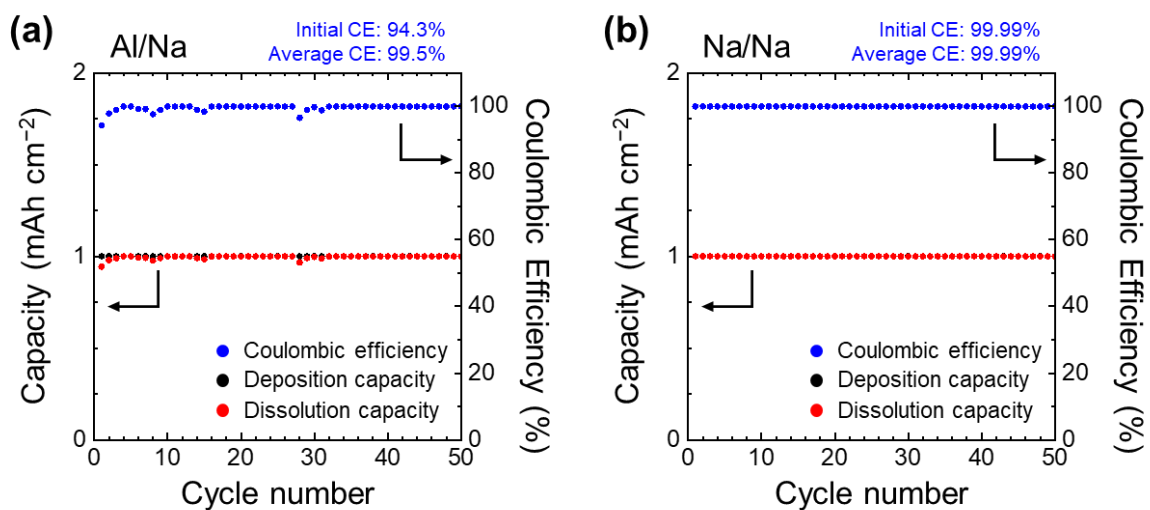

**Fig. S15** Galvanostatic sodium deposition–dissolution test results of (a) Al/Na and (b) Na/Na cells at  $0.5 \text{ mA cm}^{-2}$  ( $1 \text{ mAh cm}^{-2}$ ). Cutoff voltage:  $-1 \text{ V}-1 \text{ V}$ .



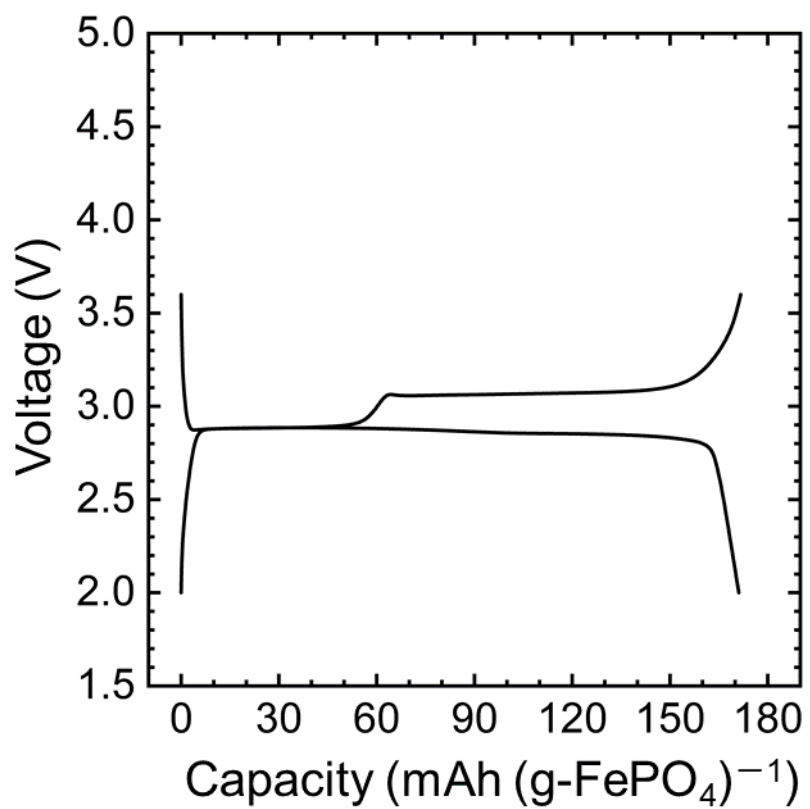

**Fig. S16** Charge–discharge curves of the Na/PO-FP full cell at 90 °C (N/P = 1.20). Rate: 10 mA (g-FePO<sub>4</sub>)<sup>-1</sup>.

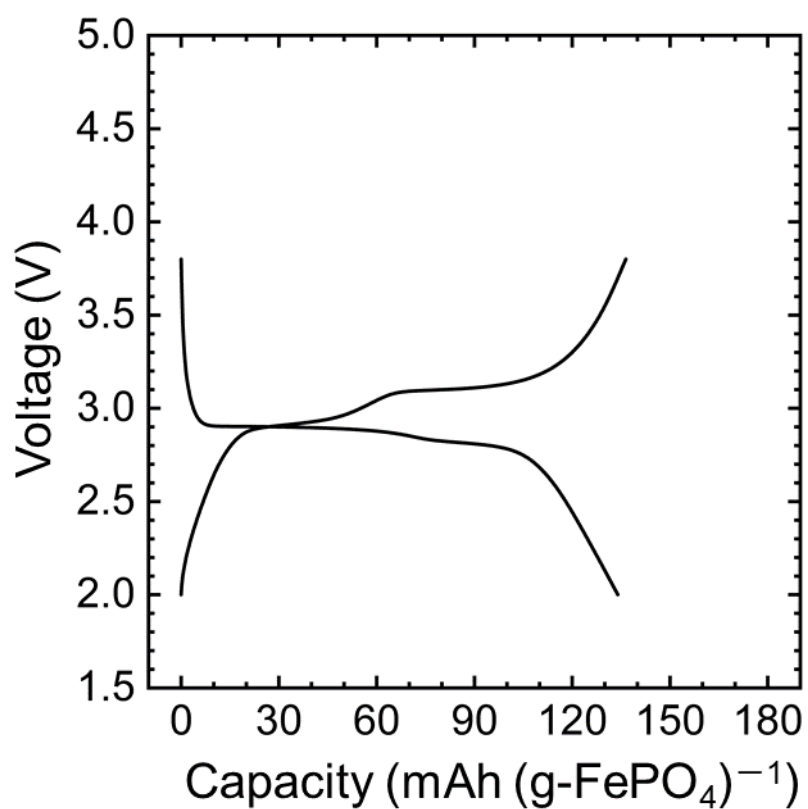

**Fig. S17** Charge–discharge curves of the Na/RO-FP full cell at 25 °C (N/P = 0.56). Rate: 10 mA (g-FePO<sub>4</sub>)<sup>-1</sup>.

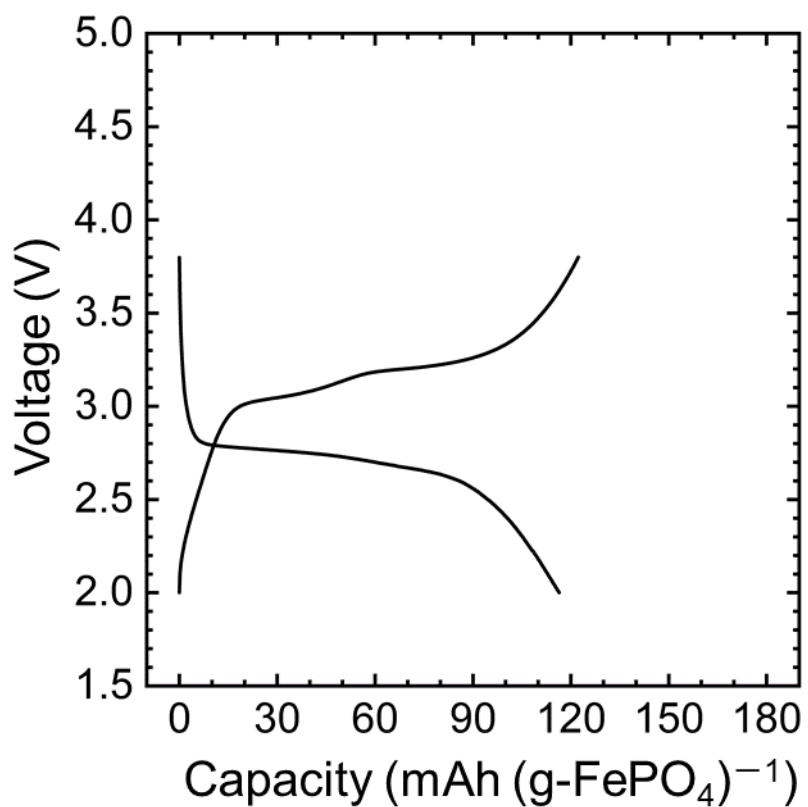

**Fig. S18** Charge–discharge curves of the Na/RO-FP full cell at 25 °C (N/P = 0.56). Rate: 100 mA (g-FePO<sub>4</sub>)<sup>-1</sup>.

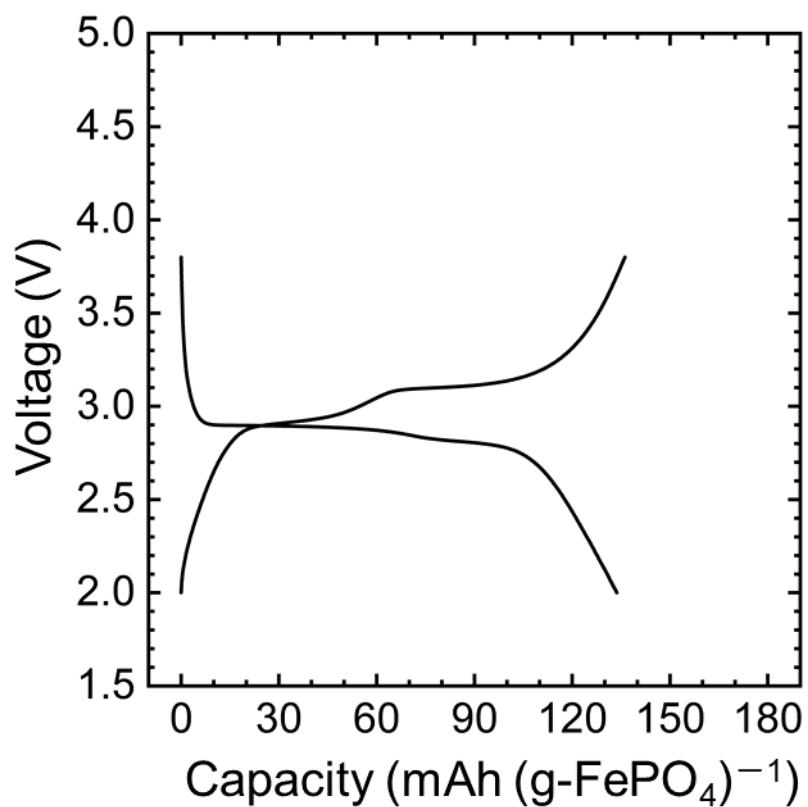

**Fig. S19** Charge–discharge curves of the Na/RO-FP full cell at 25 °C (N/P = 1.44). Rate: 10 mA (g-FePO<sub>4</sub>)<sup>-1</sup>.

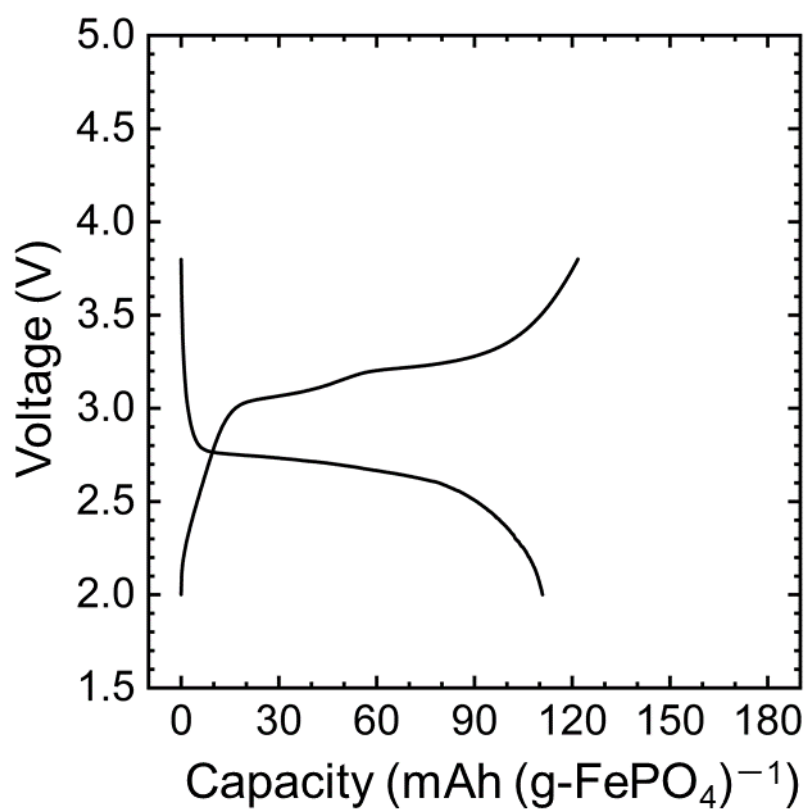

**Fig. S20** Charge–discharge curves of the Na/RO-FP full cell at 25 °C (N/P = 1.44). Rate: 100 mA (g-FePO<sub>4</sub>)<sup>-1</sup>.

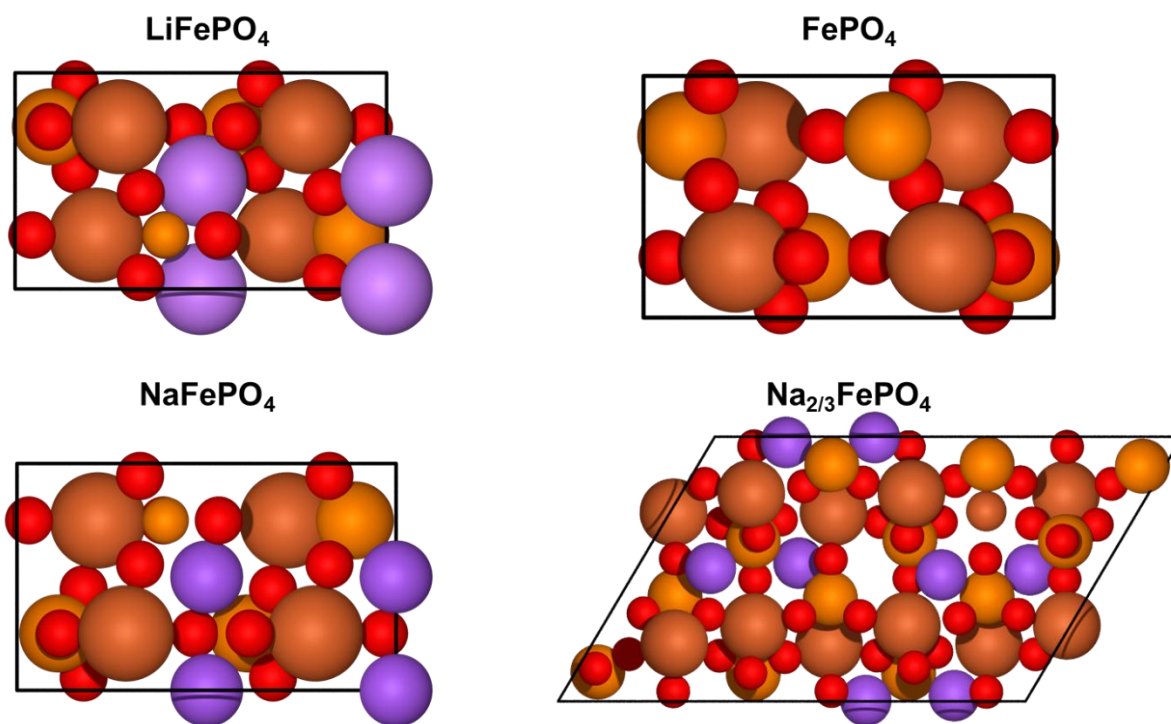

**Fig. S21** Unit cell structures of NEB calculations.

## References

1. A. S. Andersson, B. Kalska, L. Haggstrom and J. O. Thomas, *Solid State Ionics*, 2000, **130**, 41-52.
2. T. Li, J. Sun, S. Gao, B. Xiao, J. Cheng, Y. Zhou, X. Sun, F. Jiang, Z. Yan and S. Xiong, *Adv. Energy Mater.*, 2021, **11**, 2003699.
3. S. Wu, T. Wada, H. Shionoya, J. Hwang, K. Matsumoto and R. Hagiwara, *Energy Storage Mater.*, 2023, **61**, 102897.
4. J. Chen, Y. Peng, Y. Yin, M. Liu, Z. Fang, Y. Xie, B. Chen, Y. Cao, L. Xing, J. Huang, Y. Wang, X. Dong and Y. Xia, *Energy Environ. Sci.*, 2022, **15**, 3360-3368.
5. X. Zhang, F. Hao, Y. Cao, Y. Xie, S. Yuan, X. Dong and Y. Xia, *Adv. Funct. Mater.*, 2021, **31**, 2009778.
6. P. Moreau, D. Guyomard, J. Gaubicher and F. Boucher, *Chem. Mater.*, 2010, **22**, 4126-4128.
7. H. E. Swanson and E. Tatge, in *Standard X-ray Diffraction Powder Patterns*, National Bureau of Standards, 1953, vol. 1, ch. 2.2, pp. 11-12.
